# Supplementary material for: Association between white blood cell count and non-alcoholic fatty liver disease in urban Han Chinese: a prospective cohort study
Source: PubMed Central journal article supplement — BMJ Open. 2016 Jun 1;6(6):e010342. doi: 10.1136/bmjopen-2015-010342 (PMC4893843; doi:10.1136/bmjopen-2015-010342), 2016-06-01
Supplement: bmjopen-2015-010342supp_tables.pdf [file bmjopen-2015-010342supp_tables.pdf]

Table S1 Description of baseline characteristics according to the status of NAFLD grouped by gender

| Characteristics                    | male              |                       | female            |                       |
|------------------------------------|-------------------|-----------------------|-------------------|-----------------------|
|                                    | NAFLD<br>(n=2070) | Non-NAFLD<br>(n=5216) | NAFLD<br>(n=1306) | Non-NAFLD<br>(n=6609) |
| Age                                | 48.84±16.10       | 44.16±16.46*          | 48.96±14.37       | 38.95±12.06*          |
| WBC count, cells10 <sup>9</sup> /L | 6.65±1.26         | 6.40±1.29*            | 6.34±1.26         | 6.15±1.25*            |
| BMI (kg/m <sup>2</sup> )           | 25.59±2.74        | 23.83±2.83*           | 24.56±3.26        | 22.45±2.97*           |
| SBP(mmHg)                          | 131.11±18.43      | 124.92±17.81*         | 125.14±21.13      | 113.88±16.64*         |
| DBP (mmHg)                         | 76.50±11.00       | 72.69±10.67*          | 72.88±11.38       | 68.47±10.14*          |
| FPG (mmol/L)                       | 5.26±1.08         | 5.08±1.04*            | 5.15±0.93         | 4.84±0.80*            |
| TC (mmol/L)                        | 5.04±0.89         | 4.85±0.90*            | 5.29±1.06         | 4.81±0.93*            |
| TG (mmol/L)                        | 1.38(1.00)        | 1.05(0.81)*           | 1.18(0.89)        | 0.79(0.63)*           |
| HDL-C (mmol/L)                     | 1.21(0.38)        | 1.27(0.39)*           | 1.43(0.43)        | 1.45(0.42)*           |
| LDL-C (mmol/L)                     | 2.97±0.70         | 2.80±0.70*            | 3.00±0.79         | 2.63±0.71*            |
| TP (g/L)                           | 73.81±4.32        | 73.73±4.36            | 74.52±4.28        | 73.78±4.23*           |
| ALB (g/L)                          | 46.58±2.56        | 46.89±2.51*           | 45.56±2.47        | 46.01±2.48*           |
| GLO(g/L)                           | 27.24±3.97        | 26.84±3.98*           | 28.96±4.06        | 27.78±3.90*           |
| Hypertension (%)                   | 763(36.86)        | 1129(21.64)*          | 391(29.94)        | 588(8.90)*            |
| Hyperglycemia (%)                  | 256(12.37)        | 464(8.90)*            | 135(10.34)        | 255(3.86)*            |
| Current smoker (%)                 | 627(30.29)        | 1526(29.26)           | 7(0.54)           | 29(0.44)              |
| Regular exercise (%)               | 874(42.22)        | 2079(39.86)           | 412(31.55)        | 1347(20.38)*          |

WBC, white blood cell count; BMI, body mass index; SBP, systolic blood pressure; DBP, diastolic blood pressure; FPG, fasting plasma glucose; TC, total cholesterol; TG, triglyceride; HDL-C, high-density lipoprotein cholesterol; LDL-C, low-density lipoprotein cholesterol; TP, serum total protein; ALB, albumin; GLO, globin

\**P*<0.05: comparison between NAFLD and non-NAFLD grouped by gender

Table S2 Hazard ratios (HRs) and their 95% confidence intervals

| Variables                  | HR(95%CI)           | <i>P</i> |
|----------------------------|---------------------|----------|
| RBC( $10^{12}/L$ )         | 1.223(1.089, 1.374) | 0.001    |
| Hb (g/L)                   | 1.008(1.004, 1.011) | <0.001   |
| HCT(%)                     | 1.010(0.997, 1.022) | 0.122    |
| MCV(fL)                    | 0.986(0.978, 0.993) | <0.001   |
| MCH(pg)                    | 1.006(0.987, 1.027) | 0.527    |
| MCHC(g/L)                  | 1.013(1.010, 1.017) | <0.001   |
| RDW-CV(%)                  | 0.978(0.941, 1.018) | 0.277    |
| RDW-SD(fL)                 | 0.969(0.955, 0.983) | <0.001   |
| Lymphocyte( $10^9/L$ )     | 1.039(0.974, 1.108) | 0.244    |
| Monocyte( $10^9/L$ )       | 0.993(0.725, 1.359) | 0.993    |
| Neutrophil( $10^9/L$ )     | 1.051(1.015, 1.089) | 0.005    |
| Eosinophil( $10^9/L$ )     | 1.101(0.861, 1.409) | 0.444    |
| Basophil( $10^9/L$ )       | 0.578(0.101, 3.312) | 0.538    |
| Platelet count( $10^9/L$ ) | 1.002(1.001, 1.002) | <0.001   |
| PDW(fL)                    | 1.000(0.982, 1.018) | 0.963    |
| MPV(fL)                    | 0.997(0.954, 1.041) | 0.875    |
| PCT(%)                     | 1.464(0.952, 2.253) | 0.083    |
| P-LCR(%)                   | 1.000(0.995, 1.006) | 0.926    |
| TP (g/L)                   | 1.005(0.997, 1.014) | 0.224    |
| ALB (g/L)                  | 0.984(0.969, 0.999) | 0.033    |
| GLO(g/L)                   | 1.102(1.003, 1.021) | 0.009    |

RBC, red blood cell count; Hb, Hemoglobin; HCT, hematocrit; MCV, mean corpuscular volume; MCH, mean corpuscular hemoglobin; MCHC, mean corpuscular hemoglobin concentration; RDW-CV, red cell distribution width- coefficient of variation; RDW-SD, red cell distribution width-standard deviation; PDW, platelet distribution width; MPV, mean platelet volume; PCT, plateletcrit; P-LCR, Platelet-large cell rate

*P*<0.05: adjusted by baseline age, gender, smoking, regular exercise, BMI, hypertension, hyperglycemia, TC, TG, HDL-C, and LDL-C, ALB and GLO
